# Supplementary material for: Influenza infection rewires energy metabolism and induces browning features in adipose cells and tissues
Source: PubMed Central journal article supplement (PMC7224208; doi:10.1038/s42003-020-0965-6), 2020-05-14
Supplement: 42003_2020_965_MOESM8_ESM.pdf [file 42003_2020_965_MOESM8_ESM.pdf]

## Description of Additional Supplementary Files

**File Name: Supplementary Data 1**

**Description:** Ingenuity Pathway Analysis of transcriptomics of the SCAT and EWAT from IAV-infected mice vs. mock-treated mice

**File Name: Supplementary Data 2**

**Description:** Transcriptomics of in-vitro-IAV-infected preadipocytes and in vitro-IAV-infected adipocytes vs., respectively, in-vitro-mock-treated preadipocytes and in-vitro-mock-treated adipocytes

**File Name: Supplementary Data 3**

**Description:** Crude data of the morphometry analysis of the SCAT from mock-treated mice

**File Name: Supplementary Data 4**

**Description:** Crude data of the morphometry analysis of the SCAT from IAV-infected mice

**File Name: Supplementary Data 5**

**Description:** Crude data of the morphometry analysis of the EWAT from mock-treated mice

**File Name: Supplementary Data 6**

**Description:** Crude data of the morphometry analysis of the EWAT from IAV-infected mice
